# Supplementary material
Source: Springer Nature journal article supplement (https://www.springermedizin.de/resource/supplementary/12913_2012_2745_MOESM2_ESM.pdf/9531342)

## Pre care pathway

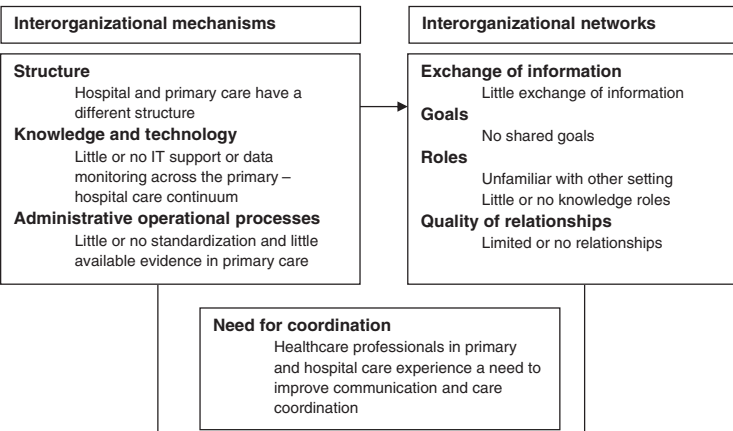

## Post care pathway

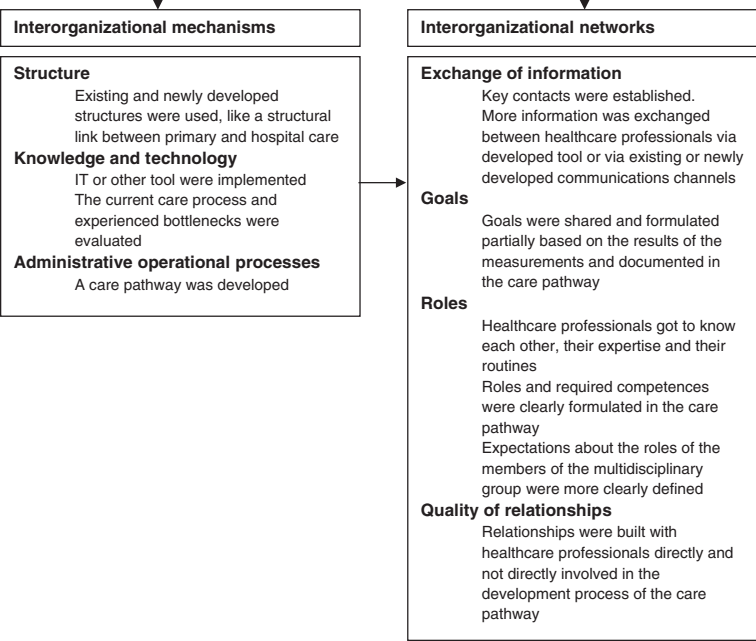

Supplement: MOESM2 [file 9531342]
